# Supplementary material for: The Effects of Increasing Fruit and Vegetable Intake in Children with Asthma on the Modulation of Innate Immune Responses
Source: MDPI journal article supplement (doi:10.3390/nu14153087), 2022-07-27

**Figure S1-** The Consolidated Standards of Reporting Trials diagram for the per-protocol analysis of the randomized controlled trial investigating the effect of a high fruit and vegetable intervention in children with asthma.

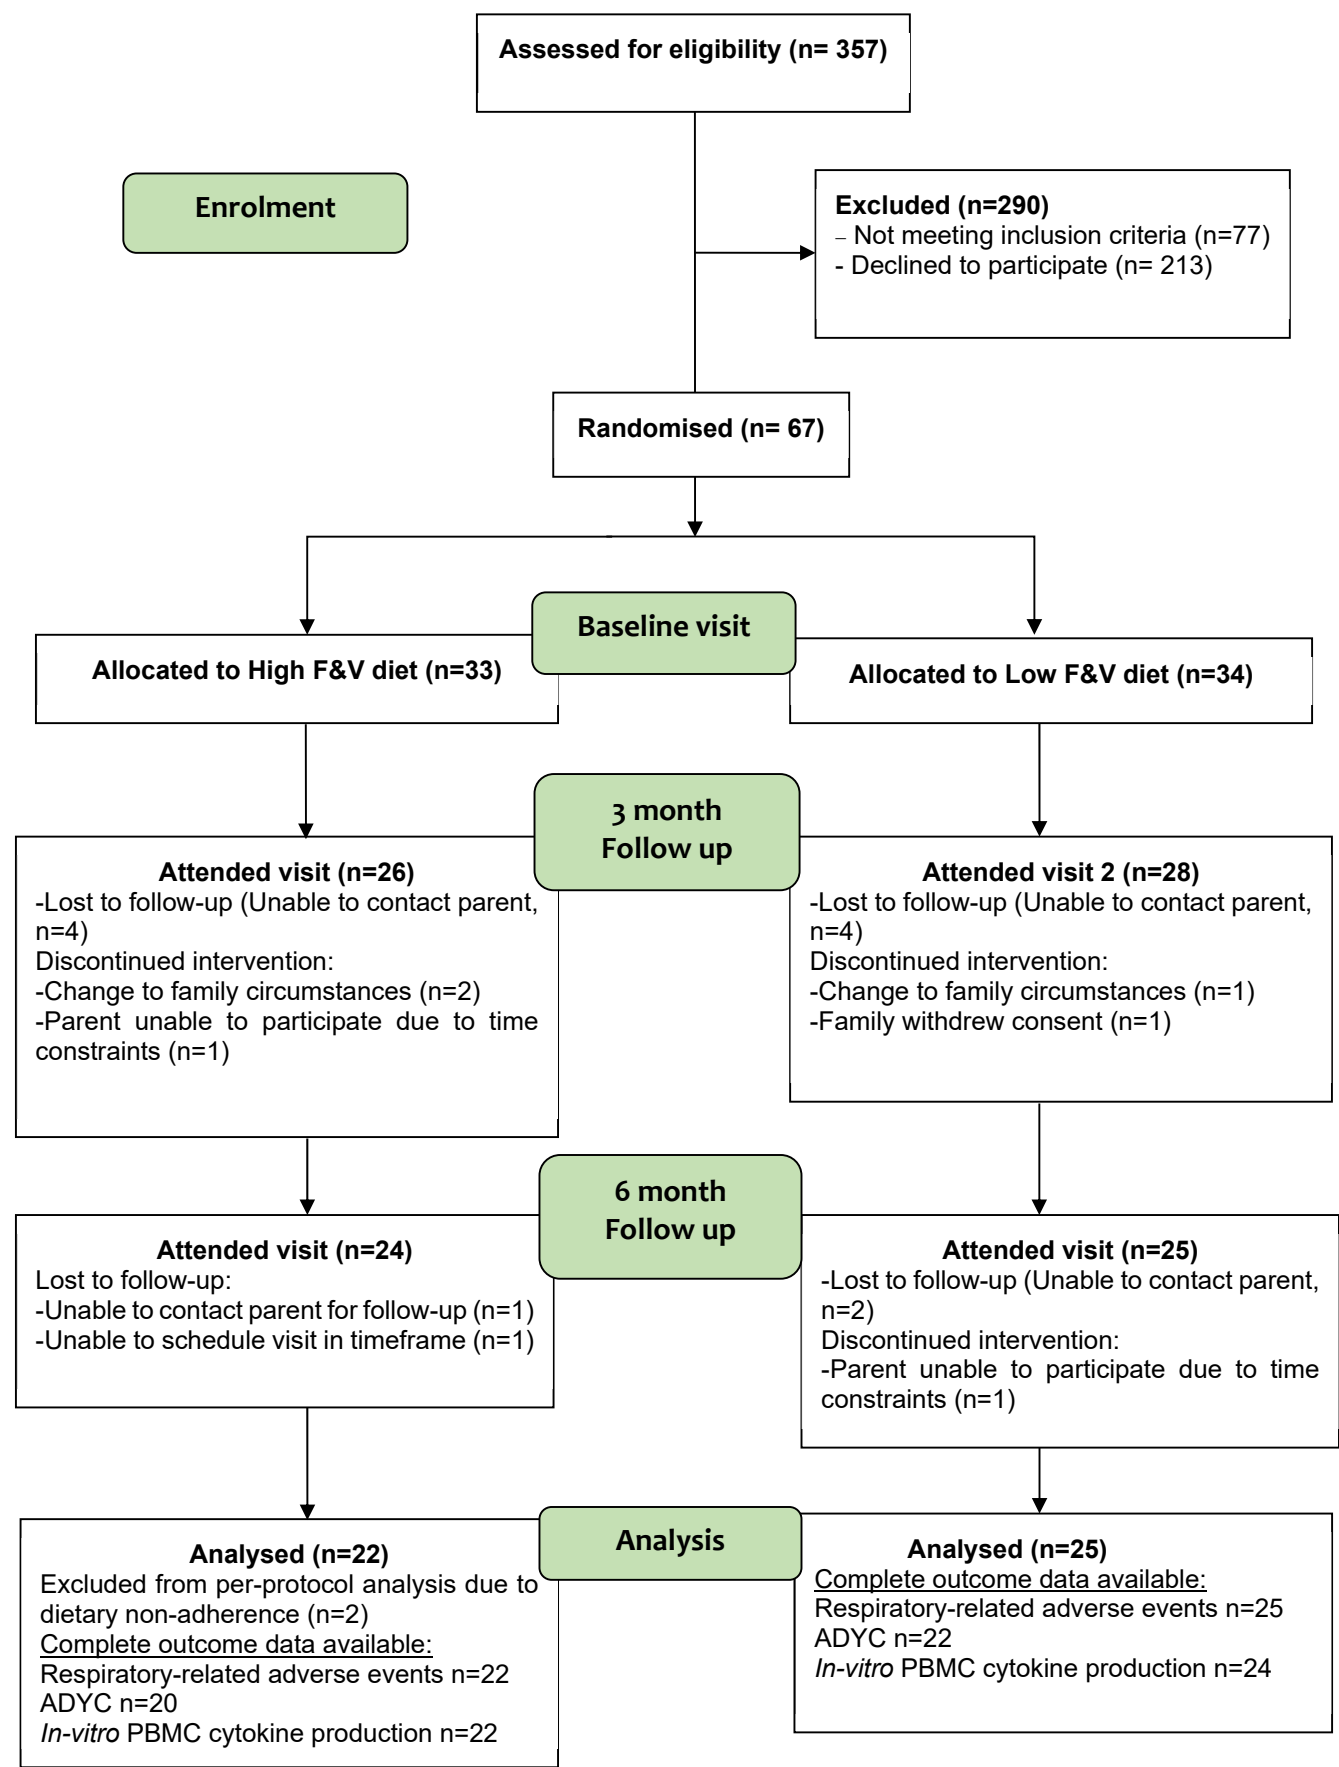

Supplement: s1 [file s1]
